# Supplementary material for: Vacuum ultraviolet photochemistry of the conformers of the ethyl peroxy radical
Source: Royal Society of Chemistry journal article supplement (doi:10.1039/d1cp02655k), 2021-01-01
Supplement: d1cp02655k1.pdf [file d1cp02655k1.pdf]

## Vacuum ultraviolet photochemistry of the conformers of ethyl peroxy radical

Zuoying Wen,<sup>a,†</sup> Xiaoxiao Lin,<sup>a,†</sup> Xiaofeng Tang,<sup>\*a</sup> Bo Long,<sup>b</sup> Chengcheng Wang,<sup>a</sup> Cuihong Zhang,<sup>a</sup> Christa Fittschen,<sup>c</sup> Jiuzhong Yang,<sup>d</sup> Xuejun Gu,<sup>a</sup> and Weijun Zhang<sup>\*a</sup>

\* Corresponding authors, e-mail: [tangxf@aiofm.ac.cn](mailto:tangxf@aiofm.ac.cn); [wjzhang@aiofm.ac.cn](mailto:wjzhang@aiofm.ac.cn)

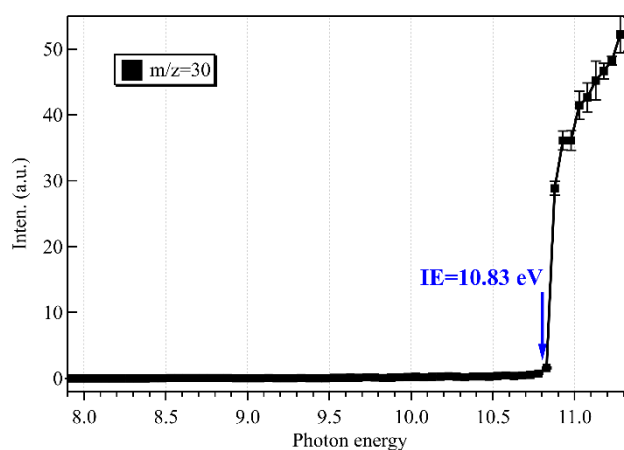

Figure S1. Photoionization spectrum of  $m/z = 30$ .

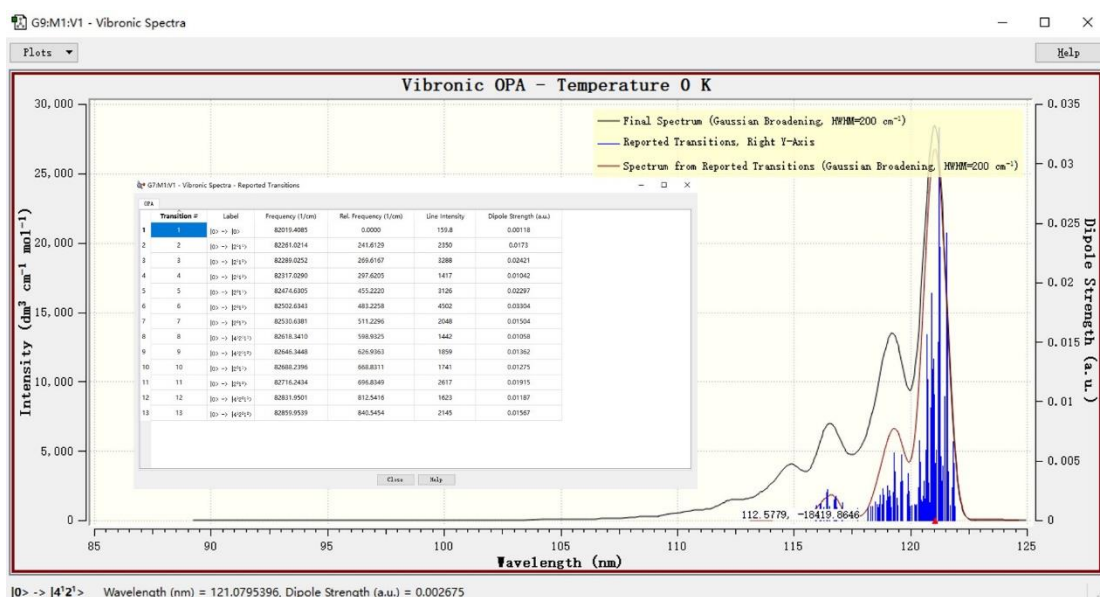

Figure S2. The calculated Franck-Condon factors and the simulated photoelectron spectrum.
